# Supplementary material for: Single-cell profiling reveals distinct subsets of CD14+ monocytes drive blood immune signatures of active tuberculosis
Source: Front Immunol. 2023 Jan 11;13:1087010. doi: 10.3389/fimmu.2022.1087010 (PMC9874319; doi:10.3389/fimmu.2022.1087010)
Supplement: Supplementary file 8 [file Table_7.xlsx]

## Sheet: Sheet1
Cluster	Pathway	Adjusted P-value	Genes
0	Cytoplasmic ribosomal proteins	3.87637e-68	RPL32;RPLP1;RPLP0;RPL10A;RPL9;RPL6;RPL7;RPS15;RPL18A;RPS18;RPLP2;RPL13;RPL37;RPS2;RPL15;RPS11;RPL18;RPS27A;RPL17;RPS13;RPS12;RPL19;RPS9;RPS8;RPS6;RPL13A;RPL35A;RPSA;RPS3A;RPS28;RPL27;RPL29;UBA52;RPS24;RPS23
0	Influenza viral RNA transcription and replication	8.19283e-66	RPL32;RPLP1;RPLP0;RPL10A;RPL9;RPL6;RPL7;RPS15;RPL18A;RPS18;RPLP2;RPL13;RPL37;RPS2;RPL15;RPS11;RPL18;RPS27A;RPL17;RPS13;RPS12;RPL19;RPS9;RPS8;RPS6;RPL13A;RPL35A;RPSA;RPS3A;RPS28;RPL27;RPL29;UBA52;RPS24;RPS23
0	Influenza infection	9.36157e-64	RPL32;RPLP1;RPLP0;RPL10A;RPL9;RPL6;RPL7;RPS15;RPL18A;RPS18;RPLP2;RPL13;RPL37;RPS2;RPL15;RPS11;RPL18;RPS27A;RPL17;RPS13;RPS12;RPL19;RPS9;RPS8;RPS6;RPL13A;RPL35A;RPSA;RPS3A;RPS28;RPL27;RPL29;UBA52;RPS24;RPS23
0	Translation	8.07269e-63	RPL32;RPLP1;RPLP0;RPL10A;RPL9;RPL6;RPL7;RPS15;RPL18A;RPS18;RPLP2;RPL13;RPL37;RPS2;RPL15;RPS11;RPL18;RPS27A;RPL17;RPS13;RPS12;RPL19;RPS9;RPS8;RPS6;RPL13A;RPL35A;RPSA;RPS3A;RPS28;RPL27;RPL29;UBA52;RPS24;RPS23
0	Protein metabolism	2.0079e-45	RPL32;RPLP1;RPLP0;RPL10A;RPL9;RPL6;RPL7;RPS15;RPL18A;RPS18;RPLP2;RPL13;RPL37;RPS2;RPL15;RPS11;RPL18;RPS27A;RPL17;RPS13;RPS12;RPL19;RPS9;RPS8;RPS6;RPL13A;RPL35A;RPSA;RPS3A;RPS28;RPL27;RPL29;UBA52;RPS24;RPS23
0	Disease	1.01682e-42	RPL32;RPLP1;RPLP0;RPL10A;RPL9;RPL6;RPL7;RPS15;CST3;RPL18A;RPS18;RPLP2;RPL13;RPL37;RPS2;RPL15;RPS11;RPL18;RPS27A;RPL17;RPS13;RPS12;RPL19;RPS9;RPS8;RPS6;RPL13A;RPL35A;RPSA;RPS3A;LYZ;RPS28;RPL27;RPL29;UBA52;RPS24;RPS23
0	Cap-dependent translation initiation	1.29615e-35	RPL32;RPLP1;RPLP0;RPL13A;RPL35A;RPL10A;RPL9;RPL6;RPL7;RPL18A;RPLP2;RPL13;RPL27;RPL37;RPL15;RPL29;RPL18;UBA52;RPL17;RPL19
0	Gene expression	1.49052e-33	RPL32;RPLP1;RPLP0;RPL10A;RPL9;RPL6;RPL7;RPS15;RPL18A;RPS18;RPLP2;RPL13;RPL37;RPS2;RPL15;RPS11;RPL18;RPS27A;RPL17;RPS13;RPS12;RPL19;RPS9;RPS8;RPS6;RPL13A;RPL35A;RPSA;RPS3A;RPS28;RPL27;RPL29;UBA52;RPS24;RPS23
0	Activation of mRNA upon binding of the cap-binding complex and eIFs, and subsequent binding to 43S	4.2676e-26	RPS9;RPS8;RPS6;RPSA;RPS3A;RPS15;RPS28;RPS18;RPS2;RPS11;RPS27A;RPS13;RPS24;RPS12;RPS23
0	p75 neurotrophin receptor signaling via NF-kB	0.000166554	NFKBIA;RPS27A;UBA52
0	T cell receptor regulation of apoptosis	0.00215406	NFKBIA;GSTP1;RPL13A;RPS3A;RPL37;RPL10A;RPL6;RPS24
0	Downregulation of ERBB4 signaling	0.00293014	RPS27A;UBA52
0	IRAK2-mediated activation of TAK1 complex	0.00402353	RPS27A;UBA52
0	Fanconi anemia pathway regulation	0.00402353	RPS27A;UBA52
0	Membrane trafficking	0.00468656	VAMP8;RPS27A;UBA52;FTL
0	Assembly of HIV virion	0.00514706	RPS27A;UBA52
0	Downregulation of ERBB2-ERBB3 signaling	0.00571593	RPS27A;UBA52
0	Initiation of the second proteolytic cleavage of Notch receptor by receptor-ligand binding	0.00595116	RPS27A;UBA52
0	Activation of IRF3/IRF7 mediated by TBK1/IKK epsilon	0.00595116	RPS27A;UBA52
0	Association of licensing factors with the pre-replicative complex	0.00595116	RPS27A;UBA52
0	TRAF6-mediated induction of TAK1 complex	0.00595116	RPS27A;UBA52
0	Activation of NF-kappaB in B cells	0.00595116	NFKBIA;RPS27A;UBA52
0	Cell death signaling by NRIF in the nucleus	0.00595116	RPS27A;UBA52
0	Sprouty regulation of FGF signaling	0.00595116	RPS27A;UBA52
0	TGF-beta receptor signaling in EMT (epithelial to mesenchymal transition)	0.00595116	RPS27A;UBA52
0	RIG-I/MDA5-mediated induction of interferon-alpha/beta pathways	0.00723684	NFKBIA;RPS27A;UBA52
0	Signaling by constitutively active EGFR	0.0078147	RPS27A;UBA52
0	Fanconi anemia pathway	0.0101311	RPS27A;UBA52
0	Downregulation of SMAD2/3-SMAD4 transcriptional activity	0.0106962	RPS27A;UBA52
0	APC/C- and Cdc20-mediated degradation of Nek2A	0.0118272	RPS27A;UBA52
0	Cellular response to hypoxia	0.0118272	RPS27A;UBA52
0	Downstream signaling events Of B cell receptor (BCR)	0.0122403	NFKBIA;RPS27A;UBA52
0	EGFR downregulation	0.0129578	RPS27A;UBA52
0	TGF-beta receptor activation of SMADs	0.0131361	RPS27A;UBA52
0	Endosomal sorting complex required for transport (ESCRT) pathway	0.0131361	RPS27A;UBA52
0	Activated NOTCH1 signaling in the nucleus	0.0156357	RPS27A;UBA52
0	Negative regulators of RIG-I/MDA5 signaling	0.0172193	RPS27A;UBA52
0	p75 neurotrophin receptor-mediated signaling	0.0200831	NFKBIA;RPS27A;UBA52
0	Cyclin D-associated events in G1	0.0210944	RPS27A;UBA52
0	BDNF signaling pathway	0.0210944	KLF10;MARCKS;RPS6;RPSA
0	Negative regulation of FGFR signaling	0.0227015	RPS27A;UBA52
0	Transcriptional activity of SMAD2/SMAD3-SMAD4 heterotrimer	0.0232604	RPS27A;UBA52
0	Wnt interactions in lipid metabolism and immune response	0.0272556	KLF10;IFI30
0	Regulation of transcription by NOTCH1 intracellular domain	0.0289922	RPS27A;UBA52
0	Signaling by the B cell receptor (BCR)	0.0293434	NFKBIA;RPS27A;UBA52
0	Amyloids	0.0323796	CST3;LYZ
0	Toll receptor cascades	0.0323796	NFKBIA;RPS27A;UBA52
0	Interferon signaling	0.0368557	IFI30;RPS27A;UBA52
0	Clathrin derived vesicle budding	0.0431033	VAMP8;FTL
0	Circadian rhythm	0.0435801	RPS27A;UBA52
0	Ubiquitin-mediated degradation of phosphorylated Cdc25A	0.0454057	RPS27A;UBA52
0	Signaling by TGF-beta receptor complex	0.0463409	RPS27A;UBA52
0	Destabilization of mRNA by AUF1 (hnRNP D0)	0.0463409	RPS27A;UBA52
1	Interferon signaling	7.06954e-11	IFITM3;GBP5;IFITM1;IFITM2;OAS1;HLA-B;HLA-C;GBP2;B2M;GBP4;HLA-E
1	Interferon alpha/beta signaling	4.01521e-10	IFITM3;IFITM1;IFITM2;OAS1;HLA-B;HLA-C;GBP2;HLA-E
1	Immune system signaling by interferons, interleukins, prolactin, and growth hormones	6.0788e-09	IFITM3;GBP5;IFITM1;IFITM2;OAS1;HLA-B;HLA-C;GBP2;B2M;GBP4;HLA-E
1	Interferon-gamma signaling pathway	6.16289e-09	GBP5;OAS1;HLA-B;HLA-C;GBP2;B2M;GBP4;HLA-E
1	Immune system	6.3508e-09	IFITM3;GBP5;IFITM1;IFITM2;HLA-B;HLA-C;HLA-E;PSMB9;FCGR3A;PTPRC;OAS1;CTSL;EVL;GBP2;B2M;CTSC;GBP4
1	Endosomal/vacuolar pathway	1.71094e-07	HLA-B;HLA-C;B2M;HLA-E
1	Antigen processing and presentation	1.71318e-06	CTSL;HLA-B;HLA-C;B2M;HLA-E;PSMB9
1	T cell receptor regulation of apoptosis	6.094e-06	IFITM3;IFITM1;FCER1G;PTPRC;ARHGDIB;HLA-B;PGK1;RHOC;RPS4Y1;CNIH4;PSMB9
1	Adaptive immune system	6.094e-06	IFITM1;FCGR3A;PTPRC;CTSL;HLA-B;HLA-C;EVL;B2M;CTSC;HLA-E;PSMB9
1	Immunoregulatory interactions between a lymphoid and a non-lymphoid cell	1.19349e-05	IFITM1;FCGR3A;HLA-B;HLA-C;B2M;HLA-E
1	Interleukin-2 signaling pathway	1.83063e-05	IFITM3;FCER1G;WARS;PTPRC;TNFSF10;EVL;CYTIP;AIF1;ACTB;CTSC;S100A11;LY6E
1	Natural killer cell-mediated cytotoxicity	2.27681e-05	FCGR3A;FCER1G;TNFSF10;HLA-B;HLA-C;HLA-E
1	Antigen processing: cross presentation	2.85448e-05	HLA-B;HLA-C;B2M;HLA-E;PSMB9
1	Phagosome	3.86033e-05	FCGR3A;CTSL;HLA-B;HLA-C;ACTB;HLA-E
1	Proteasome degradation	0.000292973	HLA-B;HLA-C;HLA-E;PSMB9
1	Viral myocarditis	0.000441486	HLA-B;HLA-C;ACTB;HLA-E
1	FSH regulation of apoptosis	0.000668928	IFITM3;CDKN1C;IFITM1;IFITM2;PGK1;ACTB
1	Allograft rejection	0.00142256	HLA-B;HLA-C;HLA-E
1	Graft-versus-host disease	0.001836	HLA-B;HLA-C;HLA-E
1	Type 1 diabetes mellitus	0.00201215	HLA-B;HLA-C;HLA-E
1	Type II interferon signaling (interferon-gamma)	0.00300631	OAS1;HLA-B;PSMB9
1	Autoimmune thyroid disease	0.00322434	HLA-B;HLA-C;HLA-E
1	Cell adhesion molecules (CAMs)	0.00351418	PTPRC;HLA-B;HLA-C;HLA-E
1	Antigen presentation: folding, assembly, and peptide loading of class I MHC proteins	0.00426176	HLA-B;HLA-C;B2M;HLA-E;PSMB9
1	Interleukin-4 regulation of apoptosis	0.00504364	FCER1G;CTSL;TNFSF10;GBP2;CTSC
1	Integrin signaling pathway	0.00554398	PTPRC;RHOC;ACTB;MYL12A
1	Ras-independent pathway in NK cell-mediated cytotoxicity	0.0143869	FCGR3A;B2M
1	Sema4D in semaphorin signaling	0.0202454	PTPRC;RHOC
1	TGF-beta regulation of extracellular matrix	0.0224777	CDKN1C;CTSL;TNFSF10;GBP2;CTSC;S100A11
1	Fas signaling pathway	0.0234587	CUX1;CD47;ACTB
1	CXCR4 signaling pathway	0.0234587	GNG2;PTPRC;RHOC
3	Leptin influence on immune response	7.73767e-08	SOCS3;CSF3R;ITGAM;PTAFR;FPR1;MNDA;CD36;FOS
3	Endogenous Toll-like receptor signaling	4.77726e-05	VCAN;CD14;S100A9;S100A8
3	Interleukin-6 signaling pathway	8.22909e-05	SOCS3;PTPRE;CEBPD;FOS;MCL1
3	Interleukin-5 regulation of apoptosis	0.000103686	EGR1;RGS2;CXCL8;PTAFR;FOS;IER2
3	Hematopoietic cell lineage	0.000143903	CSF3R;ITGAM;CD36;CD14;FCGR1A
3	Prolactin activation of MAPK signaling	0.0016585	SOCS3;SIRPA;FOS;CTSD
3	BDNF signaling pathway	0.00176634	EGR1;RGS2;VCAN;KLF6;FOS;IER2
3	TSH regulation of gene expression	0.00340549	EGR1;RGS2;CXCL8;FOS
3	Oncostatin M	0.00361161	SOCS3;CXCL8;CEBPD;S100A12;S100A9;S100A8
3	TSP1-induced apoptosis in microvascular endothelial cell	0.0045863	CD36;FOS
3	Regulation of NFAT transcription factors	0.005415	EGR1;CXCL8;FOS
3	ATF2 transcription factor network	0.00974406	SOCS3;CXCL8;FOS
3	Interleukin-4 regulation of apoptosis	0.0109589	RGS2;VCAN;CXCL8;ITGAM;FOS
3	Phagosome	0.0109589	ITGAM;CD36;CD14;FCGR1A
3	Adhesion and diapedesis of granulocytes	0.0109589	CXCL8;ITGAM
3	T cell receptor regulation of apoptosis	0.0109589	EGR1;CXCL8;CEBPD;FOS;IER2;NAIP;MCL1
3	AP-1 transcription factor network	0.0109589	EGR1;CXCL8;FOS
3	Immune system	0.0109589	SOCS3;EGR1;PTAFR;S100A12;CD36;FOS;CD14;FCGR1A;CTSD
3	Leishmaniasis	0.0110355	ITGAM;FOS;FCGR1A
3	Interferon signaling	0.0110521	SOCS3;EGR1;PTAFR;FCGR1A
3	Interleukin-3 regulation of hematopoietic cells	0.0139061	CXCL8;FOS
3	Regular glucocorticoid receptor pathway	0.0139061	EGR1;CXCL8;FOS
3	Interleukin-11 pathway	0.0172291	SOCS3;FOS
3	Jak-STAT signaling pathway	0.0172291	SOCS3;PTPRE;CSF3R;CXCL8
3	Corticotropin releasing hormone pathway	0.0190819	CXCL8;FOS
3	Interferon-gamma signaling pathway	0.0190819	SOCS3;PTAFR;FCGR1A
3	Amoebiasis	0.0230379	CXCL8;ITGAM;CD14
3	TGF-beta regulation of extracellular matrix	0.0264106	RGS2;VCAN;ITGAM;CEBPD;CD36;NAIP
3	Prolactin regulation of apoptosis	0.0293851	SOCS3;EGR1;KLF6
3	MAPK/TRK pathway	0.0293851	EGR1;FOS
3	Adipogenesis	0.037848	SOCS3;KLF6;CEBPD
3	Cell adhesion molecules (CAMs)	0.037848	VCAN;ITGAM;CD99
3	Interleukin-2 signaling pathway	0.0385018	SOCS3;KLF6;CXCL8;ITGAM;SLC2A3;FOS;CTSD
3	Urokinase-type plasminogen activator (uPA) and uPAR-mediated signaling	0.0385018	ITGAM;FPR1
3	p53 signaling pathway	0.0385018	VCAN;CTSD;MCL1
3	Immune system signaling by interferons, interleukins, prolactin, and growth hormones	0.0385018	SOCS3;EGR1;PTAFR;FCGR1A
3	Toll-like receptor signaling pathway regulation	0.0385018	CXCL8;FOS;CD14
3	Gastrin pathway	0.0385018	CXCL8;FOS
3	Interleukin-3 signaling pathway	0.039197	CXCL8;FOS
3	Malaria	0.048211	CXCL8;CD36
3	Toll receptor cascades	0.048211	S100A12;FOS;CD14
3	Interleukin-2 receptor beta chain in T cell activation	0.048211	SOCS3;FOS
4	Systemic lupus erythematosus	2.44202e-05	C1QB;C1QA;HLA-DRB5;HLA-DQA2;HLA-DPA1;C1QC
4	Antigen processing and presentation	2.44202e-05	CD74;HSPA8;HLA-DRB5;HLA-DQA2;HLA-DPA1
4	Complement activation, classical pathway	0.000135016	C1QB;C1QA;C1QC
4	Asthma	0.000499822	HLA-DRB5;HLA-DQA2;HLA-DPA1
4	PD-1 signaling	0.000499822	HLA-DRB5;HLA-DQA2;HLA-DPA1
4	Prion diseases	0.000499822	C1QB;C1QA;C1QC
4	Generation of second messenger molecules	0.000499822	HLA-DRB5;HLA-DQA2;HLA-DPA1
4	MHC class II antigen presentation	0.000499822	CD74;HLA-DRB5;HLA-DQA2;HLA-DPA1
4	Allograft rejection	0.000499822	HLA-DRB5;HLA-DQA2;HLA-DPA1
4	Graft-versus-host disease	0.000613653	HLA-DRB5;HLA-DQA2;HLA-DPA1
4	Type 1 diabetes mellitus	0.000644002	HLA-DRB5;HLA-DQA2;HLA-DPA1
4	Intestinal immune network for IgA production	0.000821496	HLA-DRB5;HLA-DQA2;HLA-DPA1
4	Autoimmune thyroid disease	0.000963429	HLA-DRB5;HLA-DQA2;HLA-DPA1
4	Phagosome	0.00148883	MSR1;HLA-DRB5;HLA-DQA2;HLA-DPA1
4	Interferon signaling	0.00172906	HLA-DRB5;HLA-DQA2;IFIT2;HLA-DPA1
4	Complement and coagulation cascades	0.00172906	C1QB;C1QA;C1QC
4	Viral myocarditis	0.00172906	HLA-DRB5;HLA-DQA2;HLA-DPA1
4	Leishmaniasis	0.00172906	HLA-DRB5;HLA-DQA2;HLA-DPA1
4	Costimulation by the CD28 family	0.00172906	HLA-DRB5;HLA-DQA2;HLA-DPA1
4	Complement cascade	0.00200045	C1QB;C1QA;C1QC
4	Immune system	0.00297135	C1QB;C1QA;CD74;HLA-DRB5;HLA-DQA2;IFIT2;HLA-DPA1;C1QC
4	Interferon-gamma signaling pathway	0.00356294	HLA-DRB5;HLA-DQA2;HLA-DPA1
4	Chagas disease	0.0041677	C1QB;C1QA;C1QC
4	Immune system signaling by interferons, interleukins, prolactin, and growth hormones	0.00774585	HLA-DRB5;HLA-DQA2;IFIT2;HLA-DPA1
4	Cell adhesion molecules (CAMs)	0.00774585	HLA-DRB5;HLA-DQA2;HLA-DPA1
4	Destabilization of mRNA by AUF1 (hnRNP D0)	0.023662	HSPA8;HSPB1
4	mRNA stability regulation by proteins that bind AU-rich elements	0.037838	HSPA8;HSPB1
